# Supplementary material
Source: PubMed Central journal article supplement (PMC9092350)
Supplement: NIHMS1801812-supplement-Supplemental_Material.pdf [file NIHMS1801812-supplement-Supplemental_Material.pdf]

Supplemental Figure 1

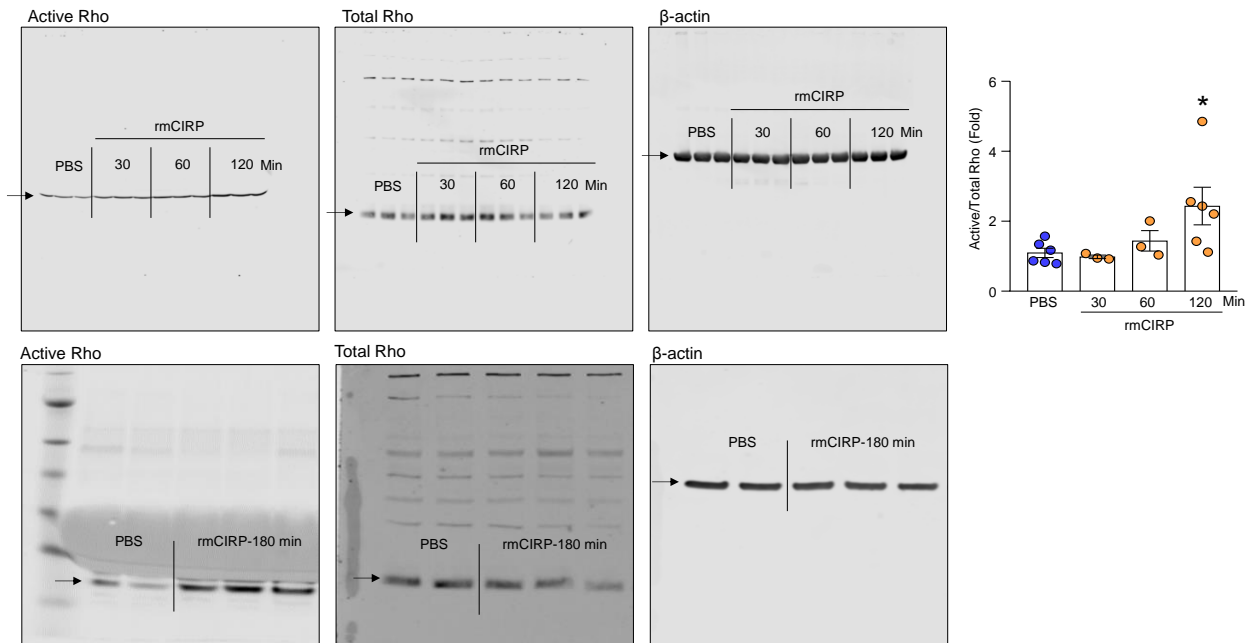

**Supplemental Figure 1: Stimulation of BMDN with rmCIRP increases Rho activity in a time-dependent manner.** BMDN ( $2.5 \times 10^6$ ) were stimulated with PBS or rmCIRP ( $5 \mu\text{g/ml}$ ) for various time-points. After stimulating the BMDN with rmCIRP, cells were lysed in lysis buffer and Rho activity was determined by GTP pull down process, followed by western blot assays using anti-Rho Ab. A fraction of each lysate was retained to determine the total Rho and  $\beta$ -actin by western blot using rabbit anti-Rho and  $\beta$ -actin Abs. Representative western blots for active Rho, total Rho, and  $\beta$ -actin are shown. Active Rho in each sample was normalized to total Rho expression and the mean values of PBS-treated group was standardized as one for comparison. Data are expressed as mean  $\pm$  SE ( $n=3-6$  samples/group). The groups were compared by one-way ANOVA and SNK method (\* $p < 0.05$  vs. PBS).
